# Supplementary material for: Investigation of the influence of high glucose on molecular and genetic responses: an in vitro study using a human intestine model
Source: PubMed Central journal article supplement (PMC5928582; doi:10.1186/s12263-018-0602-x), 2018-04-30
Supplement: 12263_2018_602_MOESM1_ESM.pdf [file 12263_2018_602_MOESM1_ESM.pdf]

Table S1

| Gene Symbol   | Forward (5'-3')                                | Reverse (5'-3')         | Reference (PMID) |
|---------------|------------------------------------------------|-------------------------|------------------|
| <b>Abca1</b>  | GCACTGAGGAAGATGCTGAAA                          | AGTTCCTGGAAGGTCTTGTTAC  | 11719471         |
| <b>Aldoa</b>  | TCACCGCATCGTGGCACCTG                           | GAAGCGCCGGTTCTCCTCGG    | 25932951         |
| <b>Aldh2</b>  | CACTTCGCCCTGTTCTTCAACC                         | CCTGCTCGGTCTTGCTATCAAAG | 21593812         |
| <b>Glut2</b>  | CTCTCCTTGCTCCTCCTCCT                           | TTGGGAGTCCTGTCAATTCC    | 25010715         |
| <b>Glut5</b>  | TCTCCTTGCAAACGTAGATGG                          | GAAGAAGGGCAGCAGAAGG     | 24426192         |
| <b>Irx</b>    | CTCTCCCTGCTGGGCTCT                             | CAAGGCACTACAGCGATCTG    | 25512384         |
| <b>Ocln</b>   | ATGAGACAGACTACACAACCTGG                        | TTGTATTCATCAGCAGCAGC    | 23668856         |
| <b>Pfkb</b>   | GCATGGGTATCTACGTGGGG                           | CTCTGCGATGTTTGAGCCTC    | 25932951         |
| <b>Pfkb3</b>  | CTGGACAGGGAGGGAGATACTA                         | AATGAAGAGCTTTGCCCGTGGTC | 16115917         |
| <b>Pgam1</b>  | AGGTCCTGCCTACTGCCTG                            | ACATCACCACGCAGGTTACAT   | 25932951         |
| <b>Pgd</b>    | TTATTTGTGGGGAGCGGAGT                           | TCTTTGTTCCCTCCTGGCAT    | 26147000         |
| <b>Sgl1</b>   | TGGCAATCACTGCCCTTTA                            | TGCAAGGTGTCCGTGTAAT     | 24426192         |
| <b>Txnip</b>  | ACAGAAAAGGATTCTGTGAAGGTGAT                     | GCCATTGGCAAGGTAAGGTG    | 18171713         |
| <b>Zo1</b>    | GAATGATGGTTGGTATGGTGCG                         | TCAGAAGTGTGTCTACTGTCCG  | 23668856         |
| <b>Cypa</b>   | TACGGGTCCTGGCATCTTG                            | CGAGTTGTCCACAGTCAGCA    | *                |
| <b>Lcn15</b>  | GCATCTGACTGCAGGGTCTT                           | CCTTCAGTACTCGGCATCC     | *                |
| <b>Skp1</b>   | AGGAGATGATGACCCAGTTCCT                         | GAGGGTCATCCTTGTGGTGG    | *                |
| <b>Srp14</b>  | CGGGCAGCGTCTATATCACC                           | CTTGGAGCTCACCACAGTGCT   | *                |
| <b>Srp54</b>  | GCGGTGTCTTTTGCAGTTC                            | ATCTGCTTCCAACAAAGCGG    | *                |
| <b>Srp72</b>  | TGAGGTCACATGGGTTTGGAC                          | ATCAATGGGCCAAACAGACCT   | *                |
| <b>Ube2L6</b> | CCCAGAGCCAAGGGAGTTTA                           | TGCAAGGTGACCTGTCTCTC    | *                |
| <b>Ube2Q2</b> | GGGTCAGTGCAAGCTTCAGAT                          | TCCACCAATACATACCCTCCT   | *                |
|               |                                                |                         |                  |
|               | * Refers that primers were designed by authors |                         |                  |
